# Supplementary material
Source: publisher site journal article supplement (https://www.spandidos-publications.com/1343/downloadSupplementary)
Supplement: Supplementary file 1 [file downloadSupplementary]

Figure S1. G<sub>2</sub>/M cell cycle arrest of HL-60 cells is induced by NL-101 in combination with DNR. (A and B) After drug treatment for 24 h, cell cycle distribution was analyzed using flow cytometry. G<sub>2</sub>/M cell cycle arrest was significant in (B) HL-60 cells, but not in (A) MV4-11 cells. (C) Similarly, the upregulation of G<sub>2</sub>/M regulatory molecules, cyclin B1 and CDC2, was detected in HL-60 cells. \*P<0.05 vs. NL-101 and DNR groups. CDC2, cell division cycle 2; COM, combination; Ctrl, control; DNR, daunorubicin.

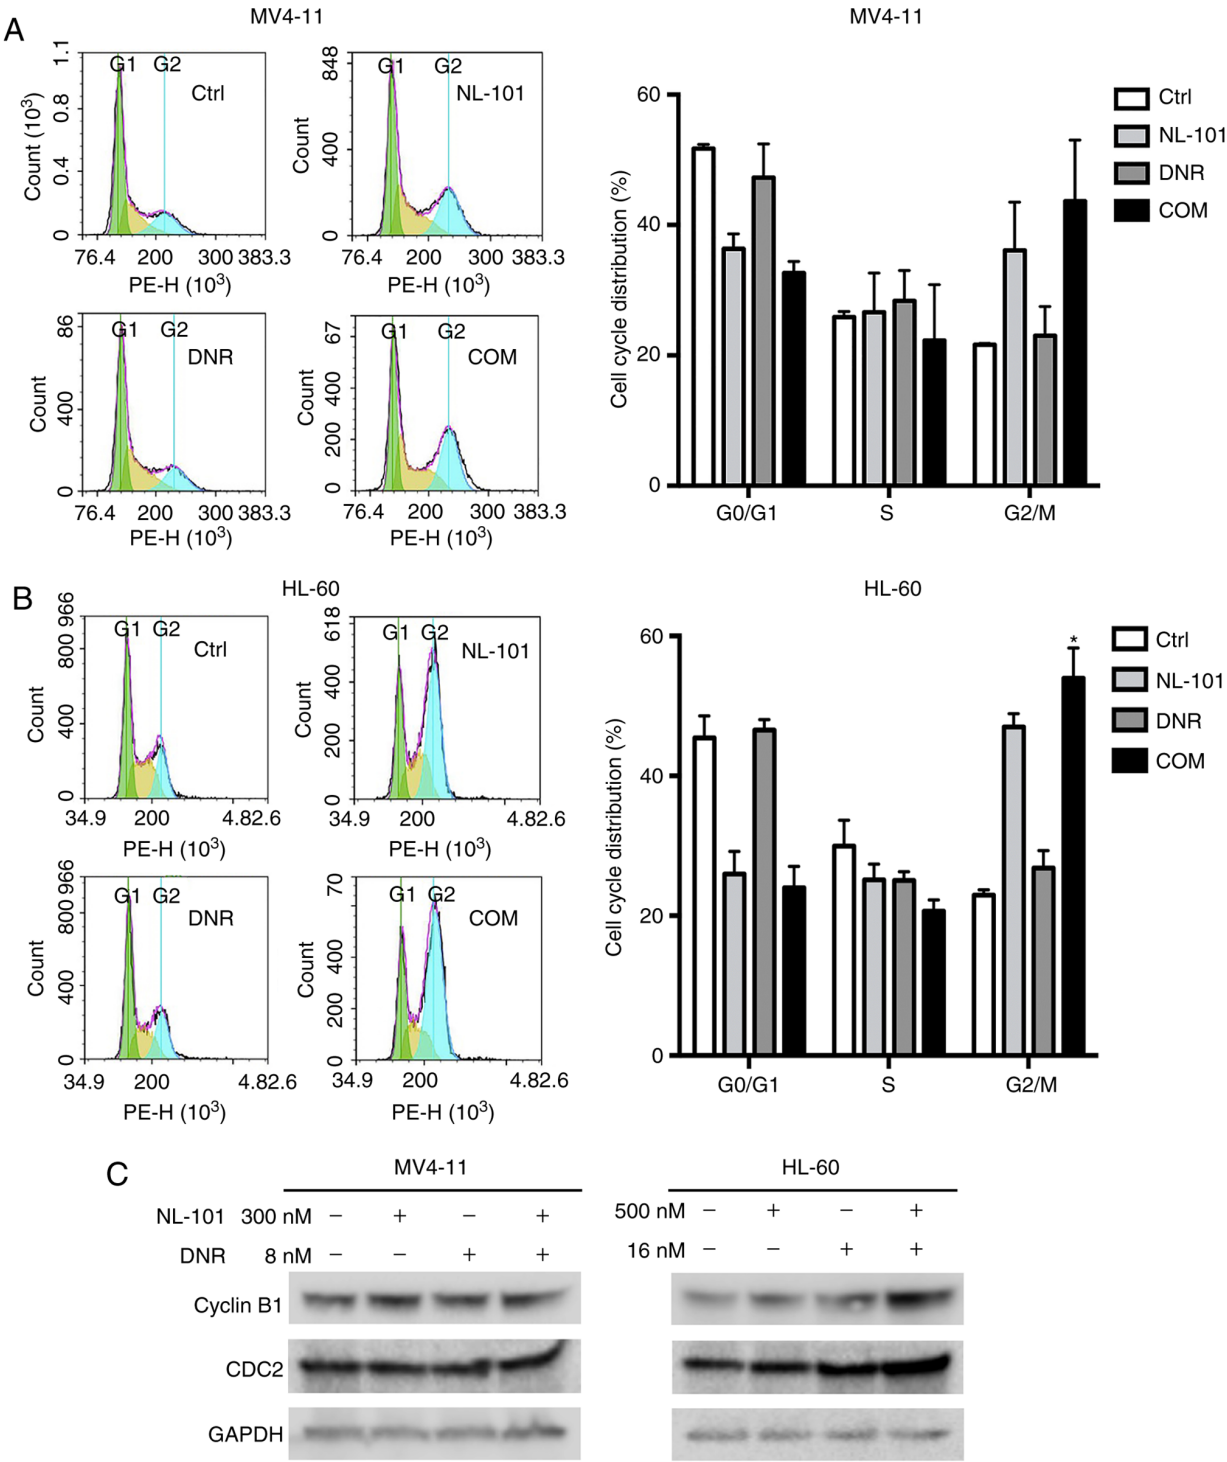

Table SI. Demographic information of the included patients.

| Patient | Diagnosis      | Sex    | Age (years) | FAB type | Cytogenetics                  | Molecular mutation |
|---------|----------------|--------|-------------|----------|-------------------------------|--------------------|
| AML1    | <i>De novo</i> | Male   | 82          | M2a      | 46, XY                        | WT1                |
| AML2    | <i>De novo</i> | Female | 49          | M5b      | 46, XX                        | DNMT3A, NPM1       |
| AML3    | <i>De novo</i> | Female | 63          | M5b      | 47, XX, +8, t(9;11) (p22;q23) | -                  |
| AML4    | <i>De novo</i> | Female | 55          | M5       | 46, XX                        | FLT3-ITD, WT1      |
| AML5    | <i>De novo</i> | Male   | 42          | M5b      | 46, XY, t(15;17) (q22;q21)    | WT1, PML-RARA      |
| AML6    | <i>De novo</i> | Male   | 74          | M2       | 46, XY                        | IDH2               |
| AML7    | <i>De novo</i> | Male   | 50          | M5       | 46, XY, ?-12 +Mar             | DNMT3A, WT1        |
| AML8    | Refractory     | Female | 53          | M1       | 46, XX                        | -                  |
| AML9    | <i>De novo</i> | Female | 62          | M2a      | 46, XX                        | FLT3-ITD, NPM1     |
| AML10   | Refractory     | Male   | 70          | M5       | 46, XY                        | FLT3-ITD           |

AML, acute myeloid leukemia; FAB, French-American-British classification system.
